# Supplementary material for: Systematically Altering Bacterial SOS Activity under Stress Reveals Therapeutic Strategies for Potentiating Antibiotics
Source: PubMed Central journal article supplement (PMC4980697; doi:10.1128/msphere.00163-16), 2016-08-10

FIG S3

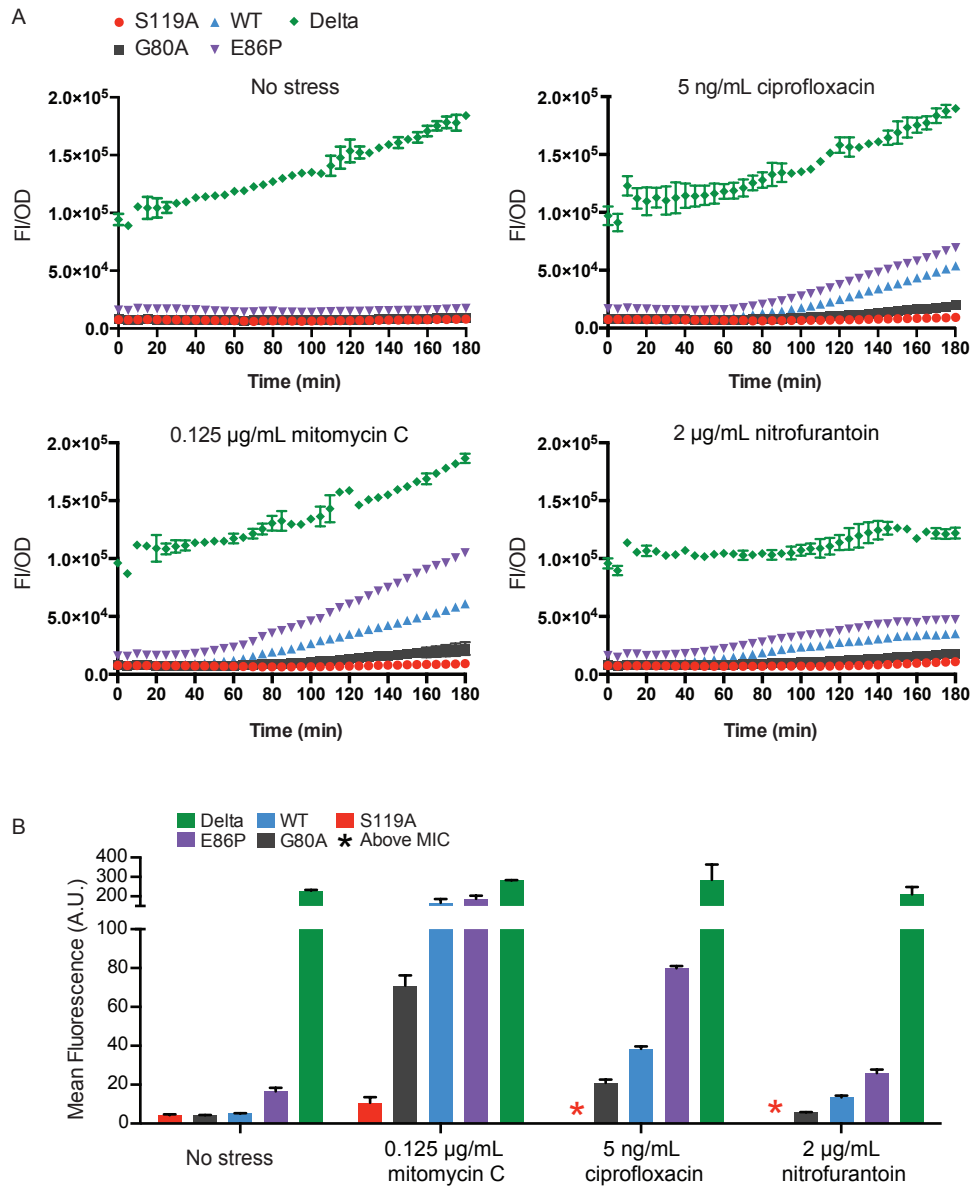

Supplement: sph004162127sf4.pdf [file sph004162127sf4.pdf]
