# Supplementary material for: Systematically Altering Bacterial SOS Activity under Stress Reveals Therapeutic Strategies for Potentiating Antibiotics
Source: PubMed Central journal article supplement (PMC4980697; doi:10.1128/msphere.00163-16), 2016-08-10
Supplement: sph004162127st7.pdf [file sph004162127st7.pdf]

**Table S1. MICs for drug - *E. coli* strains combinations**

| Antibiotic<br>( $\mu\text{g/mL}$ ) | Strains                               |                                      |        |                                      |                     |       |       |       |       |       |                |
|------------------------------------|---------------------------------------|--------------------------------------|--------|--------------------------------------|---------------------|-------|-------|-------|-------|-------|----------------|
|                                    | S119A<br>( <i>sulA</i> <sup>*</sup> ) | G80A<br>( <i>sulA</i> <sup>*</sup> ) | MG1655 | E86P<br>( <i>sulA</i> <sup>*</sup> ) | $\Delta\text{recA}$ | S119A | G80A  | WT    | E86P  | Delta | <i>recA730</i> |
| Mitomycin C                        | 0.88                                  | 4                                    | 4      | 3                                    | 0.25                | 0.75  | 4     | 4     | 3     | 2     | 2              |
| Ciprofloxacin                      | 0.012                                 | 0.028                                | 0.028  | 0.024                                | 0.004               | 0.004 | 0.016 | 0.016 | 0.016 | 0.008 | 0.012          |
| Levofloxacin                       | 0.004                                 | 0.016                                | 0.008  | 0.012                                | 0.0018              | 0.006 | 0.028 | 0.028 | 0.016 | 0.007 | 0.014          |
| Nitrofurantoin                     | 3                                     | 8                                    | 8      | 10                                   | 0.375               | 5.5   | 8     | 12    | 12    | 8     | 8              |
| Novobiocin                         | 128                                   | 128                                  | 64     | 160                                  | 64                  | 128   | 128   | 128   | 128   | 128   | 64             |
| Trimethoprim                       | 0.256                                 | 0.256                                | 0.128  | 0.256                                | 0.128               | 0.128 | 0.128 | 0.128 | 0.128 | 0.128 | 0.128          |
| Ampicillin                         | 6                                     | 6                                    | 8      | 6                                    | 8                   | 7     | 6     | 6     | 6     | 4     | 7              |
| Ceftazidime                        | 192                                   | 224                                  | 160    | 224                                  | 384                 | 288   | 288   | 256   | 256   | 160   | 384            |
| Streptomycin                       | 8                                     | 7                                    | 5      | 4                                    | 4                   | 8     | 8     | 6     | 6     | 7     | 10             |
| Spectinomycin                      | 16                                    | 16                                   | 16     | 16                                   | 16                  | 24    | 16    | 32    | 28    | 16    | 32             |
| Tetracycline                       | 2                                     | 2                                    | 2      | 2                                    | 1                   | 2     | 2     | 2     | 2     | 2     | ND             |
| Erythromycin                       | 64                                    | 64                                   | 64     | 64                                   | 20                  | 24    | 32    | 32    | 32    | 20    | 32             |
