# Supplementary material for: Systematically Altering Bacterial SOS Activity under Stress Reveals Therapeutic Strategies for Potentiating Antibiotics
Source: PubMed Central journal article supplement (PMC4980697; doi:10.1128/msphere.00163-16), 2016-08-10
Supplement: sph004162127st8.pdf [file sph004162127st8.pdf]

**Table S2. Mutation Rate for drug - *E. coli* strains combinations**

|                                   | Strain                             | Drug<br>(sublethal<br>concentration, µg/mL) | Mutation rate | 95% Confidence Interval |
|-----------------------------------|------------------------------------|---------------------------------------------|---------------|-------------------------|
| <b>No stress</b>                  | S119A ( <i>sulA</i> <sup>+</sup> ) | N/A                                         | 2e-09         | 8e-10 – 3e-09           |
|                                   | G80A ( <i>sulA</i> <sup>+</sup> )  | N/A                                         | 2e-09         | 7e-10 – 4e-09           |
|                                   | MG1655                             | N/A                                         | 4e-09         | 5e-09 – 7e-09           |
|                                   | E86P ( <i>sulA</i> <sup>+</sup> )  | N/A                                         | 3e-09         | 1e-09 – 5e-09           |
|                                   | <i>ΔrecA</i>                       | N/A                                         | 5e-09         | 3e-09 – 7e-09           |
|                                   | S119A                              | N/A                                         | 3e-09         | 2e-09 – 6e-09           |
|                                   | G80A                               | N/A                                         | 4e-09         | 2e-09 – 7e-09           |
|                                   | WT                                 | N/A                                         | 3e-09         | 1e-09 – 5e-09           |
|                                   | E86P                               | N/A                                         | 3e-09         | 2e-09 – 4e-09           |
|                                   | Delta                              | N/A                                         | 2e-08         | 2e-09 – 3e-08           |
|                                   | <i>recA730</i>                     | N/A                                         | 6e-08         | 4e-08 – 7e-08           |
|                                   | <i>recA730/lexAS119A</i>           | N/A                                         | 4e-09         | 3e-09 – 5e-09           |
| <b>Ciprofloxacin</b>              | S119A ( <i>sulA</i> <sup>+</sup> ) | 0.0025                                      | 6e-09         | 3e-09 – 1e-08           |
|                                   | G80A ( <i>sulA</i> <sup>+</sup> )  | 0.01                                        | 1e-08         | 7e-09 – 2e-08           |
|                                   | MG1655                             | 0.01                                        | 3e-08         | 2e-09 – 4e-08           |
|                                   | E86P ( <i>sulA</i> <sup>+</sup> )  | 0.01                                        | 3e-09         | 2e-08 – 4e-08           |
|                                   | <i>ΔrecA</i>                       | 0.001                                       | 5e-09         | 3e-09 – 9e-09           |
|                                   | S119A                              | 0.0025                                      | 4e-09         | 2e-09 – 5e-09           |
|                                   | G80A                               | 0.01                                        | 5e-09         | 3e-09 – 8e-09           |
|                                   | WT                                 | 0.01                                        | 2e-08         | 2e-08 – 4e-08           |
|                                   | E86P                               | 0.01                                        | 4e-08         | 3e-08 – 6e-08           |
|                                   | Delta                              | 0.005                                       | 6e-08         | 5e-08 – 8e-08           |
|                                   | <i>recA730</i>                     | 0.001                                       | 7e-08         | 4e-08 – 1e-07           |
|                                   | <b>Mitomycin C</b>                 | S119A ( <i>sulA</i> <sup>+</sup> )          | 0.125         | N/A                     |
| G80A ( <i>sulA</i> <sup>+</sup> ) |                                    | 0.25                                        | 2e-08         | 8e-09 – 4e-08           |
| MG1655                            |                                    | 0.5                                         | 2e-08         | 1e-08 – 4e-08           |
| E86P ( <i>sulA</i> <sup>+</sup> ) |                                    | 0.5                                         | 5e-08         | 3e-08 – 8e-08           |
| <i>ΔrecA</i>                      |                                    | 0.0625                                      | N/A           | N/A                     |
| S119A                             |                                    | 0.125                                       | N/A           | N/A                     |
| G80A                              |                                    | 0.25                                        | 2e-09         | 6e-10 – 5e-09           |
| WT                                |                                    | 0.5                                         | 8e-09         | 5e-09 – 1e-08           |
| E86P                              |                                    | 0.5                                         | 3e-08         | 2e-08 – 4e-08           |
| Delta                             |                                    | 0.5                                         | 4e-07         | 4e-07 – 5e-07           |
| <i>recA730</i>                    |                                    | 0.5                                         | 4e-07         | 3e-07 – 5e-07           |
| <b>Nitrofurantoin</b>             |                                    | S119A ( <i>sulA</i> <sup>+</sup> )          | 0.25          | 4e-09                   |
|                                   | G80A ( <i>sulA</i> <sup>+</sup> )  | 2                                           | 9e-09         | 7e-09 – 1e-08           |
|                                   | MG1655                             | 2                                           | 1e-08         | 9e-09 – 2e-08           |
|                                   | E86P ( <i>sulA</i> <sup>+</sup> )  | 2                                           | 2e-08         | 1e-08 – 2e-08           |
|                                   | <i>ΔrecA</i>                       | 0.1                                         | N/A           | N/A                     |
|                                   | S119A                              | 0.5                                         | 2e-09         | 1e-09 – 4e-09           |
|                                   | G80A                               | 4                                           | 2.0e-08       | 1.6e-08 – 2.5e-08       |
|                                   | WT                                 | 4                                           | 3.0e-08       | 2.0e-08 – 3.1e-08       |
|                                   | E86P                               | 4                                           | 4.0e-08       | 3.5e-08 – 5.3e-08       |
|                                   | Delta                              | 2                                           | 1.2e-07       | 1.0e-07 – 1.5e-07       |
|                                   | <i>recA730</i>                     | 2                                           | 1.6e-07       | 1.3e-07 – 1.9e-07       |
|                                   | <b>Ampicillin</b>                  | S119A ( <i>sulA</i> <sup>+</sup> )          | 2             | 6e-09                   |
| G80A ( <i>sulA</i> <sup>+</sup> ) |                                    | 2                                           | 7e-09         | 5e-09 – 1e-08           |
| MG1655                            |                                    | 2                                           | 8e-09         | 5e-09 – 1e-08           |
| E86P ( <i>sulA</i> <sup>+</sup> ) |                                    | 2                                           | 2e-08         | 1e-08 – 3e-08           |
| <i>ΔrecA</i>                      |                                    | 2                                           | 2e-09         | 1e-09 – 4e-09           |
| S119A                             |                                    | 2                                           | 4e-09         | 3e-09 – 6e-09           |
| G80A                              |                                    | 2                                           | 7e-09         | 4e-09 – 1e-08           |
| WT                                |                                    | 2                                           | 7e-09         | 4e-09 – 1e-08           |
| E86P                              |                                    | 2                                           | 9e-09         | 6e-09 – 1e-08           |
| Delta                             |                                    | 2                                           | 1.7e-08       | 1.3e-08 – 2.2e-08       |
| <i>recA730</i>                    |                                    | 2                                           | 7e-08         | 6e-08 – 9e-08           |

**Table S2; continued from above**

|                     | Strain                             | Drug (sublethal concentration, µg/mL) | Mutation rate | 95% Confidence Interval |
|---------------------|------------------------------------|---------------------------------------|---------------|-------------------------|
| <b>Streptomycin</b> | S119A ( <i>sulA</i> <sup>+</sup> ) | 2                                     | 2e-09         | 1e-09 – 5e-09           |
|                     | G80A ( <i>sulA</i> <sup>+</sup> )  | 2                                     | 1e-09         | 7e-10 – 3e-09           |
|                     | MG1655                             | 2                                     | 2e-09         | 9e-10 – 5e-09           |
|                     | E86P ( <i>sulA</i> <sup>+</sup> )  | 2                                     | 2e-09         | 1e-09 – 3e-09           |
|                     | <i>ΔrecA</i>                       | 2                                     | 3e-09         | 2e-09 – 5e-09           |
|                     | S119A                              | 2                                     | 9e-10         | 4e-10 – 2e-09           |
|                     | G80A                               | 2                                     | 2e-09         | 9e-10 – 4e-09           |
|                     | WT                                 | 2                                     | 4e-09         | 2e-09 – 7e-09           |
|                     | E86P                               | 2                                     | 4e-09         | 3e-09 – 7e-09           |
|                     | Delta                              | 2                                     | 9e-09         | 6e-09 – 1e-08           |
|                     | <i>recA730</i>                     | 2                                     | 6e-09         | 3e-09 – 1e-08           |
| <b>Trimethoprim</b> | S119A ( <i>sulA</i> <sup>+</sup> ) | 0.032                                 | 4e-09         | 3e-09 – 6e-09           |
|                     | G80A ( <i>sulA</i> <sup>+</sup> )  | 0.032                                 | 7e-09         | 5e-09 – 1e-08           |
|                     | MG1655                             | 0.032                                 | 1e-08         | 9e-09 – 2e-08           |
|                     | E86P ( <i>sulA</i> <sup>+</sup> )  | 0.032                                 | 1e-08         | 9e-09 – 2e-08           |
|                     | <i>ΔrecA</i>                       | 0.032                                 | 6e-09         | 4e-09 – 9e-09           |
|                     | S119A                              | 0.032                                 | 1.0e-08       | 7e-09 – 1.4e-08         |
|                     | G80A                               | 0.032                                 | 8e-09         | 5e-09 – 1e-08           |
|                     | WT                                 | 0.032                                 | 1e-08         | 9e-09 – 2e-08           |
|                     | E86P                               | 0.032                                 | 3e-08         | 2e-08 – 4e-08           |
|                     | Delta                              | 0.032                                 | 1.0e-07       | 9e-08 – 1.4e-07         |
|                     | <i>recA730</i>                     | 0.032                                 | 1.6e-07       | 1.3e-07 – 2.0e-07       |
| <b>Novobiocin</b>   | S119A ( <i>sulA</i> <sup>+</sup> ) | 16                                    | 3e-09         | 1e-09 – 7e-09           |
|                     | G80A ( <i>sulA</i> <sup>+</sup> )  | 16                                    | 3e-09         | 2e-09 – 5e-09           |
|                     | MG1655                             | 16                                    | 3e-09         | 1e-09 – 5e-09           |
|                     | E86P ( <i>sulA</i> <sup>+</sup> )  | 16                                    | 3e-09         | 2e-09 – 6e-09           |
|                     | <i>ΔrecA</i>                       | 16                                    | 6e-09         | 4e-09 – 1.0e-08         |
|                     | S119A                              | 16                                    | 5e-09         | 3e-09 – 7e-09           |
|                     | G80A                               | 16                                    | 8e-09         | 6e-09 – 1.0e-08         |
|                     | WT                                 | 16                                    | 5e-09         | 3e-09 – 7e-09           |
|                     | E86P                               | 16                                    | 2e-08         | 1.4e-08 – 2.2e-08       |
|                     | Delta                              | 16                                    | 4e-08         | 3e-08 – 5e-08           |
|                     | <i>recA730</i>                     | 16                                    | 5e-08         | 4e-08 – 6e-08           |
